# Supplementary material for: Relative importance of βcyto- and γcyto-actin in primary mouse embryonic fibroblasts
Source: PubMed Central journal article supplement — Mol Biol Cell. 2017 Mar 15;28(6):771–82. doi: 10.1091/mbc.E16-07-0503 (PMC5349784; doi:10.1091/mbc.e16-07-0503), 2017-03-15
Supplement: supp_E16-07-0503v1_CombinedSupMats.pdf [file supp_E16-07-0503v1_CombinedSupMats.pdf]

# Supplemental Materials

*Molecular Biology of the Cell*

Patrinostro et al.

## Supplemental Methods

### Primers

| Gene                                                                                                                                                                   | Forward Primer (5'→3')    | Reverse Primer (5'→3')    |
|------------------------------------------------------------------------------------------------------------------------------------------------------------------------|---------------------------|---------------------------|
| mACTA1 Cloning                                                                                                                                                         | CACCTCACTTCCTACCCTCGGCA   | GCAAAACAGAATGGCTGGCTT     |
| mACTA2 Cloning                                                                                                                                                         | CACCGCTGCTCCAGCTATGTGTGA  | ATCCATGCACGTGTGTATGCTTTA  |
| mACTB Cloning                                                                                                                                                          | CACCGCGAGCACAGCTTCTTTG    | AGGTAAGGTGTGCACTTTTATTGGT |
| mACTC Cloning                                                                                                                                                          | CACCCGCCTACAGAACCCACCAAA  | TGCAAGTCCTGGTCTGGTTTA     |
| mACTG1 Cloning                                                                                                                                                         | CACCCCGCCGCCGGCTTACAC     | CAGTTACTGCAGCACTTTTATTTTC |
| mACTG2 Cloning                                                                                                                                                         | CACCTTGCTCTGGTATTTCTGCCAA | GGTTTTAATGATCTGTGGCTGGTC  |
| <b>Note:</b> CACC is added to all forward cloning primers in order to facilitate directional cloning into pDENTR vector, they are not part of the actin gene sequence. |                           |                           |
| mACTA1 qRT                                                                                                                                                             | GCCAGCCTCTGAAACTAGACA     | CCCACGATGGATGGGAACAC      |
| mACTA2 qRT                                                                                                                                                             | TCCAGCTATGTGTGAAGAGGA     | CCAACCATTACTCCCTGATGTCT   |
| mACTB qRT                                                                                                                                                              | GCGAGCACAGCTTCTTTG        | TTTGACATGCCGGAGCCGTT      |
| mACTC qRT                                                                                                                                                              | GATGTGTGACGACGAGGAGA      | ATACCACCATGACACCCTGG      |
| mACTG1 qRT                                                                                                                                                             | GATTAAGATCATTGCTCCCCCTGA  | GCACCTGCTCAGTCCATCTA      |
| mACTG2 qRT                                                                                                                                                             | ATGTGTGAAGAAGAGACCACCG    | GCCATTCCCACCATCACAC       |

### ON-TARGET Plus siRNA Sequences

|                                                                                       |                                                                                                                   |
|---------------------------------------------------------------------------------------|-------------------------------------------------------------------------------------------------------------------|
| Control<br>ON-TARGETplus Non-targeting Pool<br>Cat# D-001810-10-05                    | 5'-UGGUUUACAUGUCGACUAA-3'<br>5'-UGGUUUACAUGUUGUGUGA-3'<br>5'-UGGUUUACAUGUUUUCUGA-3'<br>5'-UGGUUUACAUGUUUUCUA-3'   |
| βcyto-actin<br>ON-TARGETplus Mouse Actb siRNA-<br>SMARTpool<br>Cat# L-057827-01-0005  | 5'-GCAAGUGCUUCUAGGCGGA-3'<br>5'-UUUUAAAUCUCCGCCUUA-3'<br>5'-CCAAGUAUCCAUGAAAUAA-3'<br>5'-GCAGUUGGUUGGAGCAAAC-3'   |
| γcyto-actin<br>ON-TARGETplus Mouse Actg1 siRNA-<br>SMARTpool<br>Cat# L-042869-00-0005 | 5'-ACGCAGAUAAUGUUUGAAA-3'<br>5'-CCUAGCACGAUGAAGAUUA-3'<br>5'-AGAGGGAAAUUGUUCGUGA-3'<br>5'-GCAUGGAGUCCUGUGGUUAU-3' |

**Supplemental table 1**

| <b>Mouse Actin Isoform</b> | <b>Target Scan</b>                                                                                                     | <b>microRNA.org</b>                                                                                                                        | <b>PicTar</b>                                        | <b>Consensus miRNA</b>        |
|----------------------------|------------------------------------------------------------------------------------------------------------------------|--------------------------------------------------------------------------------------------------------------------------------------------|------------------------------------------------------|-------------------------------|
| <b>ACTB</b>                | mir-1<br>mir-132<br>mir-145<br>mir-205<br>mir-206<br>mir-212<br>mir-212-3p<br>mir-34a<br>mir-34b<br>mir-194<br>mir-613 | mir-1<br>mir-1192<br>mir-1295p<br>mir-132<br>mir-145<br>mir-194<br>mir-205<br>mir-206<br>mir-212<br>mir-495<br>mir-544<br>let-7a<br>let-7b | mir-124a<br>mir-145<br>mir-18a<br>mir-18b<br>mir-205 | mir-145<br>mir-205            |
| <b>ACTG1</b>               | mir-103a<br>mir-107<br>mir-10a<br>mir-10b<br>mir-10c<br>mir-145<br>mir-31<br>mir-485                                   | mir-103<br>mir-107<br>mir-10a<br>mir-10b<br>mir-145<br>mir-186<br>mir-199a<br>mir-31<br>mir-361<br>mir-381<br>mir-615<br>mir-873           | mir-10a<br>mir-10b<br>mir-145<br>mir-199a            | mir-10a<br>mir-10b<br>mir-145 |

**Supplemental table 1:** Predicted Actb and Actg1 3'UTR binding microRNAs

Three miRNA prediction databases were used to analyzed possible miRNAs that target either/both Actb and Actg1 3'UTRs. Consensus miRNAs that were predicted in all databases are listed in the right column.

## Supplemental Figure Legends

Supplemental Figure 1

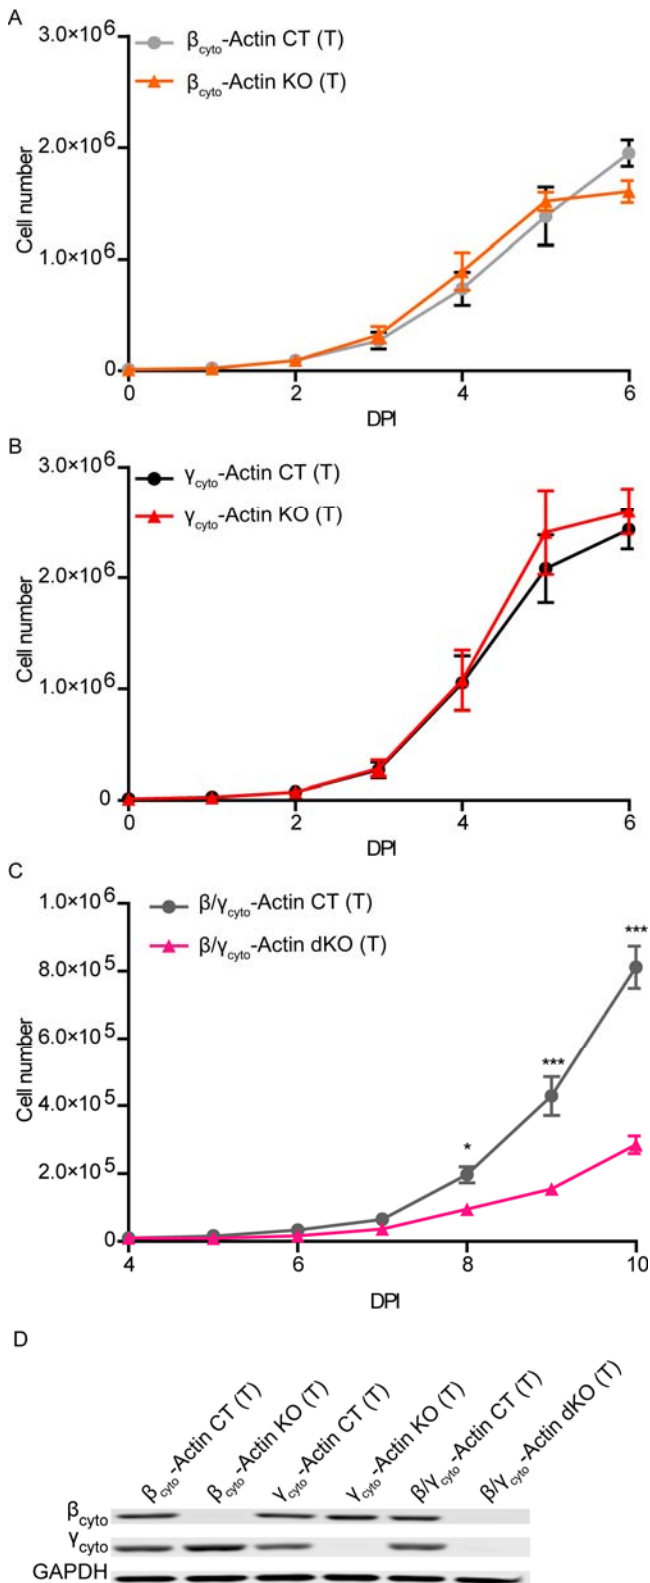

**Supplemental figure 1:**  $\beta_{\text{cyto}}$ -actin sKO SV40 LargeT antigen immortalized MEFs were not growth impaired. (A) Representative Western blot of SV40 LargeT antigen transformed (T) CT and KO MEF lysates blotted with  $\alpha_{\text{sm}}$ -actin,  $\beta_{\text{cyto}}$ -actin and  $\gamma_{\text{cyto}}$ -actin antibodies; GAPDH served as loading control. (B-D) Growth curve analysis of SV40 LargeT antigen transformed (T) CT and KO MEFs (n=3, hand counted in duplicate). Asterisks denote \*P<0.05, \*\*\* P<0.001. (Two-way ANOVA with Bonferoni post-test, error bars are s.e.m.).

Supplemental Figure 2

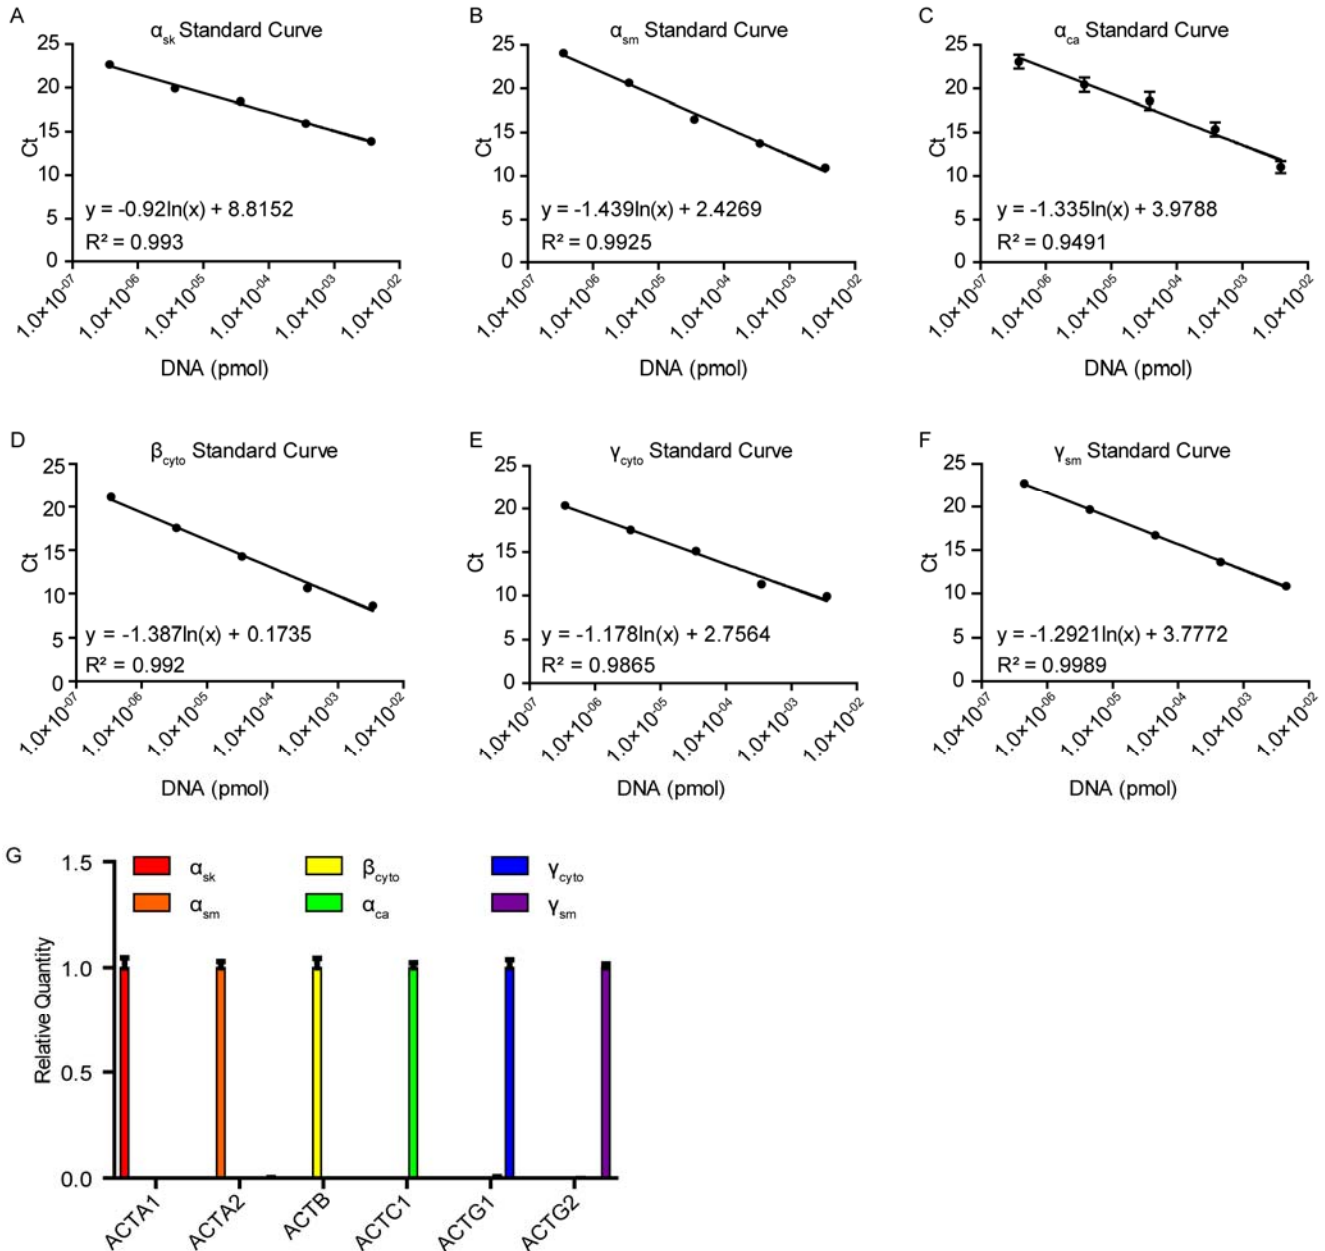

**Supplemental figure 2:** Mouse actin isoform standard curves and primer specificity analysis. (A-F) Representative standard curves generated using specific actin isoform primers with the corresponding control actin construct in a ten-fold dilution. (G) Representative graph of qRTPCR primer specificity. Each primer set was used to amplify all actin isoform control

constructs to calculate relative quantity. Color bars represent individual actin isoform, y-axis denotes relative quantity, x-axis denotes primer set.

Supplemental Figure 3

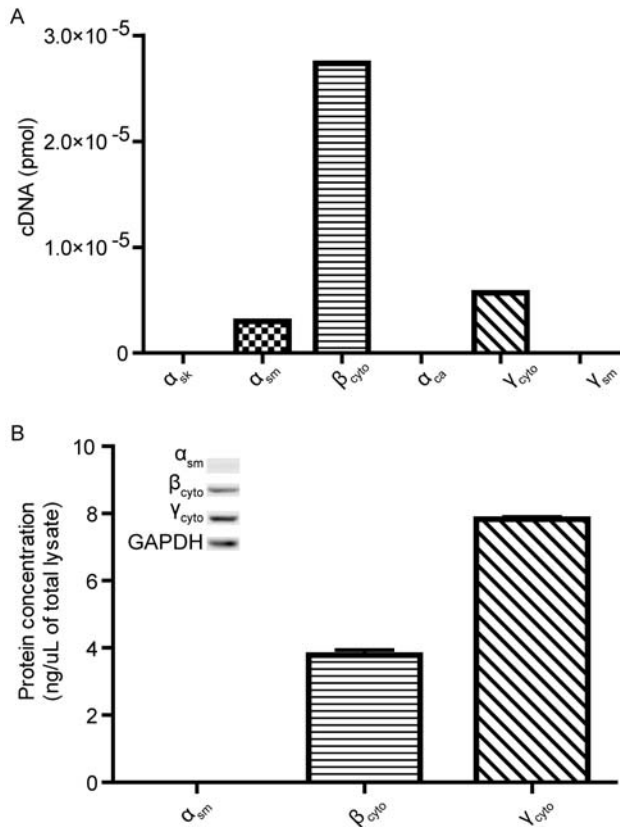

**Supplemental figure 3:**  $\beta_{cyto}$ - and  $\gamma_{cyto}$ -actin are the dominant actin isoforms in NIH3T3 fibroblast. (A) Actin isoform transcript profiling in NIH3T3 fibroblasts. Calculated transcript amount (pmol) were calculated based on the standard curve, amplified in parallel (n=1, in triplicate). (B) Representative Western blot of NIH3T3 fibroblast lysates blotted with  $\alpha_{sm}$ -actin,  $\beta_{cyto}$ -actin and  $\gamma_{cyto}$ -actin antibodies; GAPDH served as loading control. Calculated protein concentrations (ng/ $\mu$ L of lysate) were determined based on the standard curve, blotted in parallel (n=1, in duplicate).

Supplemental Figure 4

A

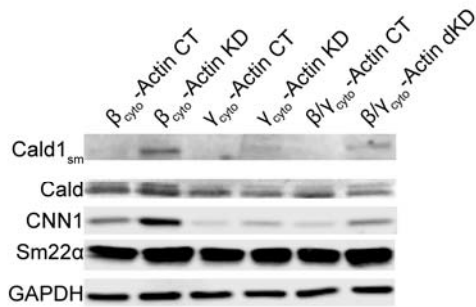

C

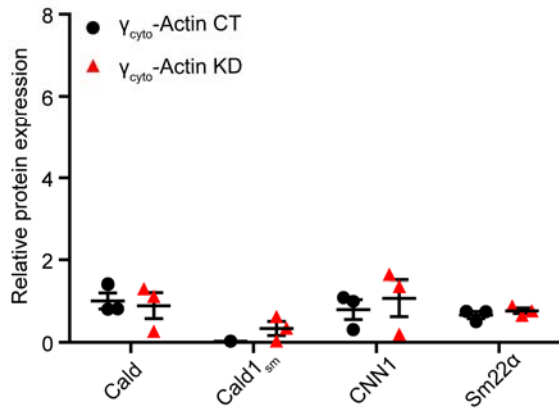

B

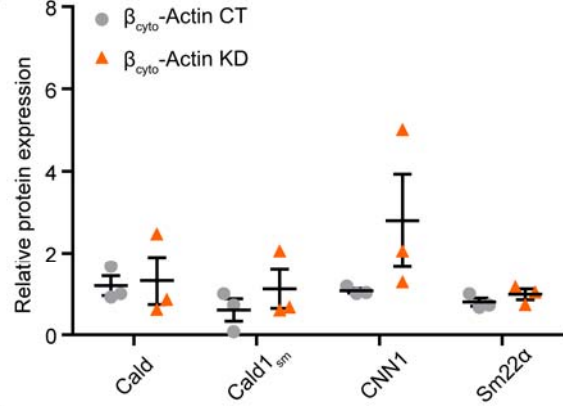

D

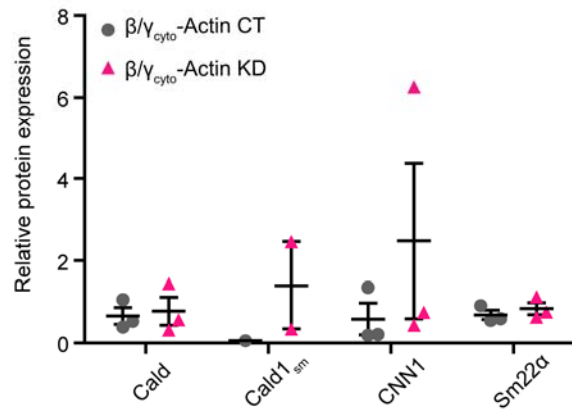

**Supplemental figure 4:** Cald1 and CNN1 protein expression are upregulated in  $\beta_{\text{cyto}}$ -actin siRNA KD MEFs. (A) Representative Western blot analysis of CT and KD MEFs at 3dpi for sKD and 4dpi for dKD blotted with Cald, CNN1, and Sm22 $\alpha$ ; GAPDH was used as loading control. (B-D) Relative protein expression were normalized to GAPDH and relative to the paired embryo control (n=3). (One sample T-test, error bars are s.e.m.).

A

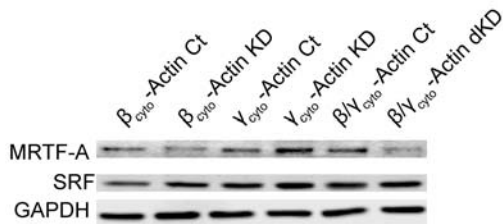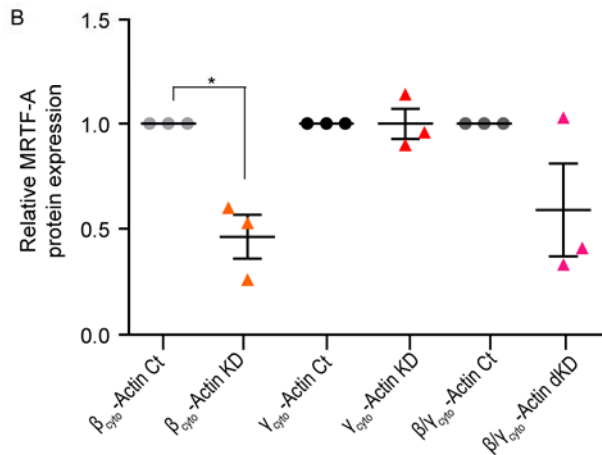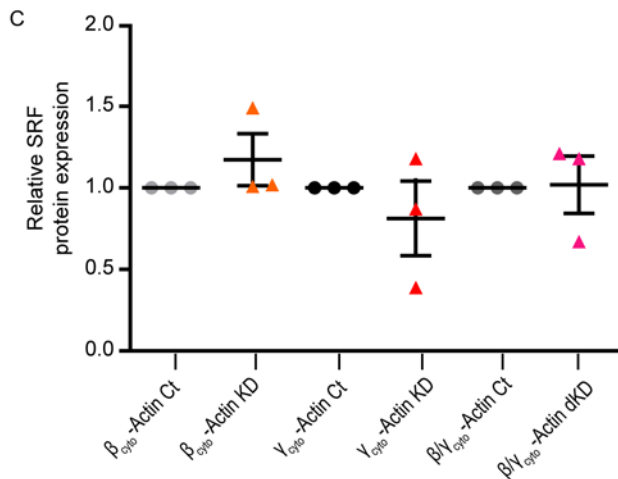

**Supplemental figure 5:** MRTF-A protein expression is down regulated in  $\beta_{\text{cyto}}$ -actin KD MEFs. (A) Representative Western blot analysis of CT and KD MEFs at 3dpi for sKD and 4dpi for dKD blotted with MRTF-A and SRF; GAPDH served as loading control. (B) Calculated relative protein expression were normalized to GAPDH and relative to the paired embryo control (n=3). Asterisk denotes \*P<0.05 (One sample T-test, error bars are s.e.m.).



Supplemental Figure 6

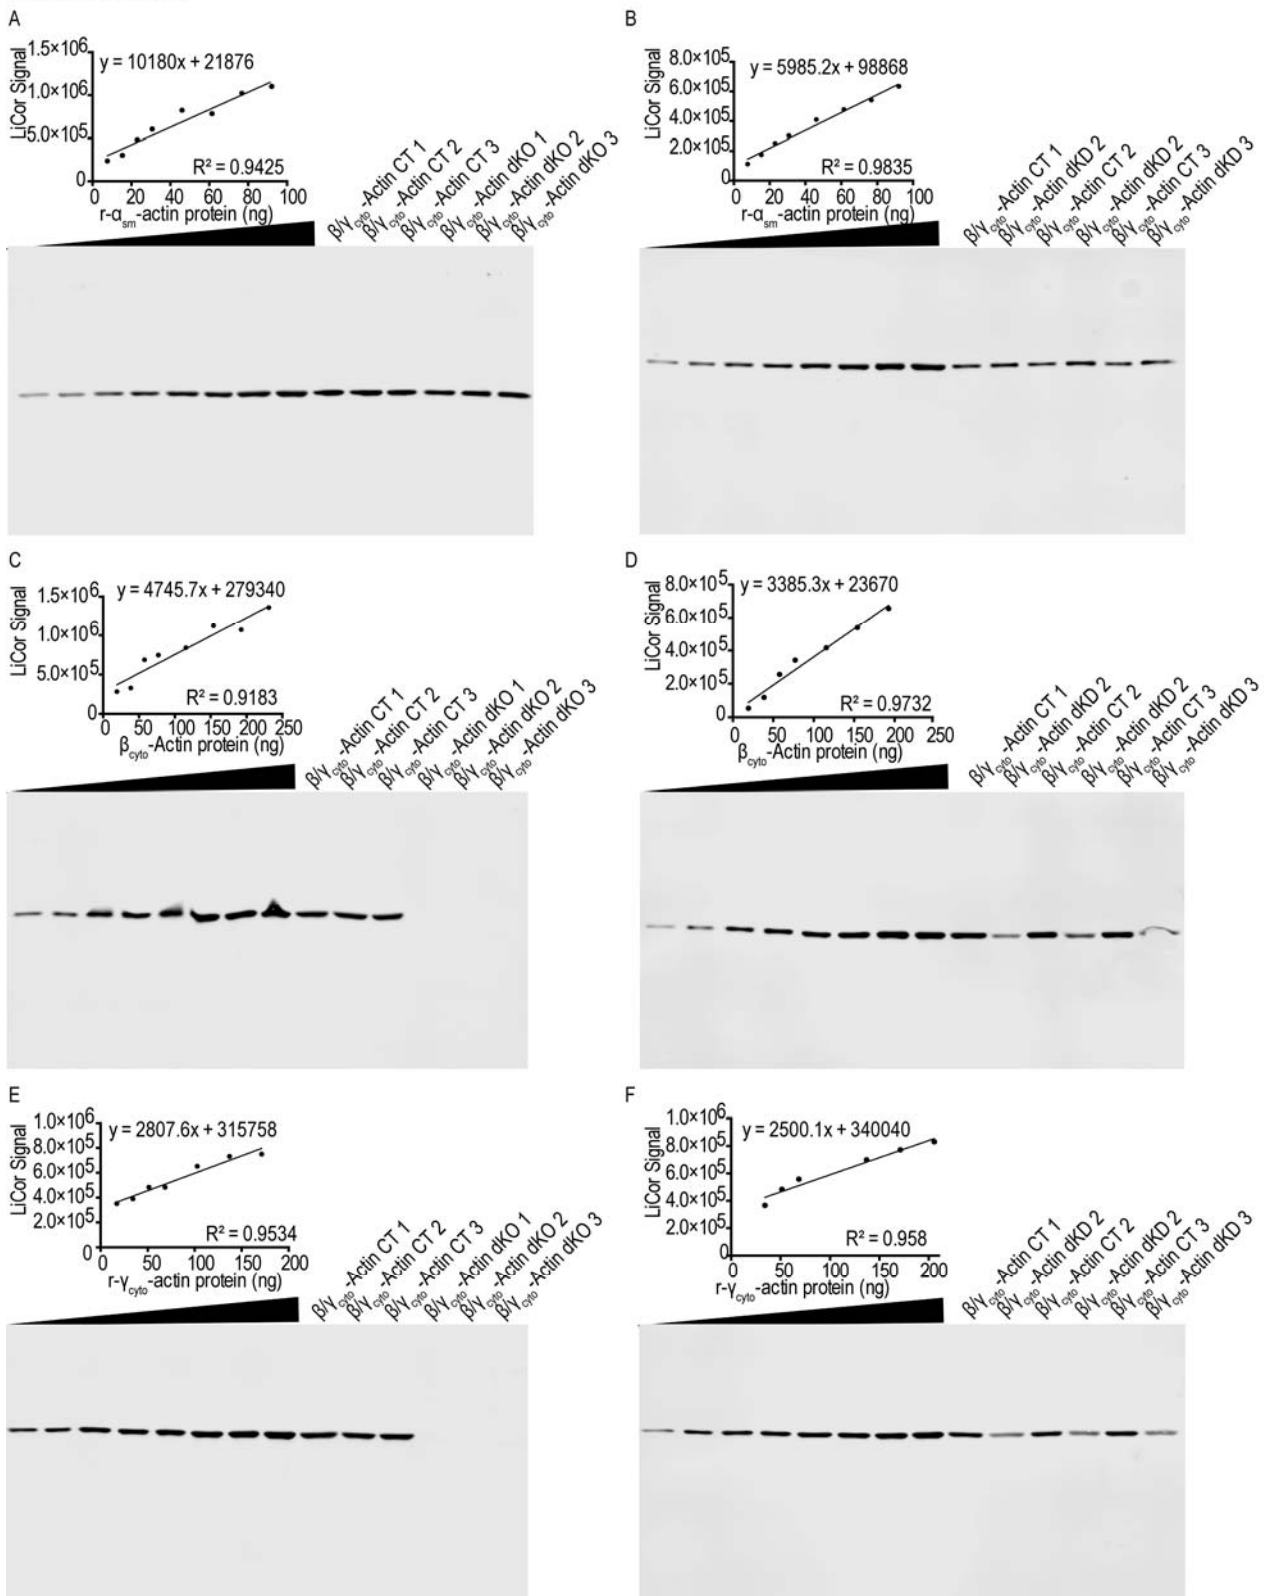

**Supplemental figure 6:** Representative quantitative Western blots. (A, C, E)  $\beta/\gamma_{cyto}$ -Actin CT - and  $\beta/\gamma_{cyto}$ -Actin dKO, at 9dpi, from 3 separate embryos are blotted with  $\alpha_{sm}$ ,  $\beta_{cyto}$ - and  $\gamma_{cyto}$ -actin antibodies. (B, D, F)  $\beta/\gamma_{cyto}$ -Actin CT - and  $\beta/\gamma_{cyto}$ -Actin dKD, at 4dpi, from 3 separate embryos blotted with  $\alpha_{sm}$ ,  $\beta_{cyto}$ - and  $\gamma_{cyto}$ -actin antibodies. For  $\alpha_{sm}$ -actin Western blots, both

KO and KD samples were diluted by at least 5-fold in order for the immune activity intensity to fit within the standard curve. An increasing amount of purified  $\alpha_{sm}$ ,  $\beta_{cyto}$  and  $\gamma_{cyto}$ -actins are blotted in parallel to generate a standard curve and used to calculate the amount of individual actin isoform in lysates.
